# Supplementary material for: Drug Utilization and Real-World Therapeutic Outcomes of Ginkgo biloba L. Leaf Extract in Prevention and Treatment of Cognitive Impairment
Source: Research Square preprint supplement (doi:10.21203/rs.3.rs-8146289/v1), 2026-02-11
Supplement: Supplementary file 1 [file f3e240b41c3f95a72417181e.docx]

Supplementary Table 1: Reason for Application

| **Reason for Application** | **Preventive Use** | **Chronic Symptoms** | **Acute**  **Symptoms** |
| --- | --- | --- | --- |
| All Patients n (%) | 71 (38.6) | 76 (41.3) | 37 (20.1) |
| **Reason for Application  in Relation to Gender** | **Preventive Use** | **Chronic Symptoms** | **Acute**  **Symptoms** |
| Woman n (%) | 48 (42.1) | 50 (43.9) | 16 (14) |
| Men n (%) | 23 (32.9) | 26 (37.1) | 21 (30) |
| **Pearson's Chi-Square Test** | χ²(2, n=184)=6.93, p=0.031*, Cramer’s V=0.19 | | |

Supplementary Table 2: Prevention

| **Type of Prevention** | **without Symptoms** | **with Symptoms** |
| --- | --- | --- |
| All Patients n (%) | 19 (27.5) | 50 (72.5) |
| **Type of Prevention  in Relation to Gender** | **without Symptoms** | **with Symptoms** |
| Woman n (%) | 14 (73.7) | 33 (66) |
| Men n (%) | 5 (26.3) | 17 (34) |

Supplementary Table 3: Severity of Symptoms

| **Severity of Symptoms** | **0 - No  Symptoms** | **Symptoms** | | | | |
| --- | --- | --- | --- | --- | --- | --- |
| **1** | **2** | **3** | **4** | **5 - Most severe imaginable Symptoms** |
| All Patients  n (%) | 19 (10.3) | 41 (22.3) | 57 (31) | 49 (26.6) | 17 (9.2) | 1 (0.5) |
| **Severity of Symptoms  in Relation to Reason for Application** | **0 - No  Symptoms** | **Symptoms** | | | | |
| **1** | **2** | **3** | **4** | **5 - Most severe imaginable Symptoms** |
| Preventive Use n (%) | 19 (27.5) | 22 (31.9) | 15 (21.7) | 10 (14.5) | 3 (4.3) | - |
| Chronic Symptoms  n (%) | - | 9 (12.2) | 31 (41.9) | 26 (35.1) | 7 (9.5) | 1 (1.4) |
| Acute Symptoms  n (%) | - | 10 (27) | 10 (27) | 12 (32.4) | 5 (13.5) | - |

Supplementary Table 4: Treatment habits (Frequency of Application)

| **Frequency of Application** | **Daily** | **If-required** |
| --- | --- | --- |
| All Patients n (%) | 187 (97.9) | 4 (2.1) |

Supplementary Table 5: Treatment habits (Duration of Application)

| **Duration of Application** | **≤7 days** | **8-30 days** | **>30 days** |
| --- | --- | --- | --- |
| All Patients n (%) | 2 (1.1) | 24 (13) | 159 (85.9) |
| **Duration of Application  in Relation to Agegroup** | **≤7 days** | **8-30 days** | **>30 days** |
| 18-30 years n (%) | 2 (7.1) | 8 (28.6) | 18 (64.3) |
| 31-50 years n (%) | - | - | 12 (100) |
| 51-65 years n (%) | - | 7 (18.9) | 30 (81.1) |
| 66-75 years n (%) | - | 6 (10.5) | 51 (89.5) |
| >75 years n (%) | - | 3 (5.9) | 48 (94.1) |
| *Spearman Correlation* | *p=0.002**, r=0.23, n=185* | | |
| **Duration of Application  in Relation to Reason for Application** | **≤7 days** | **8 – 30 days** | **>30 days** |
| Preventive Use n (%) | 2 (2.9) | 10 (14.5) | 57 (82.6) |
| Chronic Symptoms n (%) | - | 2 (2.7) | 71 (97.3) |
| Acute Symptoms n (%) | - | 11 (29.7) | 26 (70.3) |
| *Mann-Whitney-U Test* | *p(preventive/chronic)=0.003***, r=0.25, n=142;*  *p(chronic/acute)<0.001***, r=0.39, n=110* | | |
| *P-values adjusted for multiple comparison using the Bonferroni correction* | *padj(preventive/chronic)=0.006***, r=0.25, n=142;*  *padj(chronic/acute)<0.001***, r=0.39, n=110* | | |

Supplementary Table 6: Treatment Habits (Daily Dose - Groups)

| **Daily Dose** | **< 240 mg** | **Recommended Dose: 240 mg** | **> 240 mg** |
| --- | --- | --- | --- |
| All Patients n (%) | 107 (57.2) | 66 (35.3) | 14 (7.5) |
| **Daily Dose  in Relation to Gender** | **< 240 mg** | **Recommended Dose: 240 mg** | **> 240 mg** |
| Woman n (%) | 73 (63.5) | 36 (31.3) | 6 (5.2) |
| Men n (%) | 34 (47.2) | 30 (41.7) | 8 (11.1) |
| *Mann-Whitney U Test* | *p=0.021* r=0.17, n=187* | | |
| **Daily Dose  in Relation to Agegroup** | **< 240 mg** | **Recommended Dose: 240 mg** | **> 240 mg** |
| 18-30 years n (%) | 15 (51.7) | 13 (44.8) | 1 (3.4) |
| 31-50 years n (%) | 5 (41.7) | 4 (33.3) | 3 (25) |
| 51-65 years n (%) | 21 (55.3) | 14 (36.8) | 3 (7.9) |
| 66-75 years n (%) | 28 (50) | 25 (44.6) | 3 (5.4) |
| >75 years n (%) | 38 (73.1) | 10 (19.2) | 4 (7.7) |
| *Spearman Correlation* | *p=0.046* r=0.15, n=187* | | |

Supplementary Table 7: Perceived Therapeutic Effectiveness

| **Perceived Therapeutic Effectiveness** | **very good –**  **distinct** | **moderate –**  **significant** | **minimal –**  **mild** | **No Therapeutic Benefit -**  **Symptoms unchanged or worsened** |
| --- | --- | --- | --- | --- |
| Patients n (%) | Therapeutic benefit: 173 (90.6) | | | 18 (9.4) |
| 36 (18.8) | 83 (43.5) | 54 (28.3) |
| **Perceived Therapeutic Effectiveness in Relation to Duration of Application** | **very good –**  **distinct** | **moderate –**  **significant** | **minimal –**  **mild** | **No Therapeutic Benefit -**  **Symptoms unchanged or worsened** |
| ≤7 days  n (%) | Therapeutic benefit: 1 (50.0) | | | 1 (50) |
| - | - | 1 (50) |
| 8-30 days  n (%) | Therapeutic benefit: 18 (75) | | | 6 (25) |
| 2 (8.3) | 8 (33.3) | 8 (33.3) |
| >30 days  n (%) | Therapeutic benefit: 149 (93.7) | | | 10 (6.3) |
| 34 (21.4) | 73 (45.9) | 42 (26.4) |
| *Mann-Whitney U Test* | *p(8-30 days/>30days) =0.005* r=0.21, n=183* | | | |

Supplementary Table 8: Perceived Tolerability

| **Perceived Tolerability** | **No Undesired Drug Events** | **No significant impairment** | **Significant  impairment** | **Outweigh effectiveness** |
| --- | --- | --- | --- | --- |
| All Patients  n (%) | 170 (89) | Undesired Drug Event: 18 (9.4) | | |
| 18 (9.4) | 2 (1.0) | 1 (0.5) |
| Type of Undesired Drug Events | - | “ear noises after a few minutes” (n=1)  not specified (n=17) | not specified (n=2) | “Significant side effects occurred after 14 days, including itching, gastrointestinal complaints, headaches, and dizziness. As a result, the intake of the product was discontinued. “(n=1) |
